# Supplementary material for: Single cell immunoprofile of synovial fluid in rheumatoid arthritis with TNF-α/JAK inhibitor treatment
Source: Research Square preprint supplement (doi:10.21203/rs.3.rs-3166544/v1), 2023-07-24
Supplement: Supplementary file 1 [file 776ce30b16b2703c68dd1be0.xlsx]

## Sheet: a
Diagnostic signature	Disease severity signature	ACR20_Y signature	ACR20_N signature
SPP1	SPP1	STAT1	HIF1A
CD44	STAT1	FOS	IFI30
PTGER4	ETV7	IRF1	IL1B
LAMP1	IRF1	GBP5	FOS
FAM3C	EOMES	GZMA	JUN
CD74		GZMH	CXCL13
COPA		GZMK	TIGIT
ICAM1		CCL5	CTLA4
SPN		FCGR3A	S100A9
ITGAL		HLA-A	MIF
TNFRSF1A		MT2A	IFITM1
FASLG		GBP1	CXCR4
NRP1		IFITM3	JUND
VEGFB		IFI16	ISG15
FLT1		IFNGR1
CLEC2D		LAG3
TNF		PDCD1
ICOS		NFKBIA
FAS
CD40
CD40LG
LGALS9
HAVCR2
SORL1
PLXNB2
SEMA4D
MIF
TNFRSF14
PDCD1
TNFRSF1B
TFRC
TNFSF13B
HLA-F
LILRB2
LILRB1
CCL4
CCR5
SLC7A1
IL15
BTLA
CXCR6
CXCL16
CCL7
IFNG
CD2
CD58
PTPRC
MRC1
CD28
CD86
SELL
SELPLG
CD99
PILRA
SIGLEC1
CD6
ALCAM
IGFL2
IGFLR1
CCL2
CCL3
CCL3L1
CCR1
SDC4
CCR2
CXCR3
CXCL13
IL1B
IL1RAP
ICAM3
HLA-DRA
TNFSF12
IL1RN
MMP9
ITGB1
HBEGF
HLA-A
A2M
ITGB2
PECAM1
HLA-E
ADAM17
ITGAM
ITGB7
IL18
PIK3CB
OSM
RAB27A
NCOR1
YY1
BTG2
B4GALT1
GNAS
LRRFIP1
IKZF3
PBXIP1
MAF
CLEC2B
MLLT6
JUND
TPM4
SOD2
S100A9
PTPN1
ITGA4
GZMB
VIM
STAT5B
STAT3
SOCS3
SBNO2
S100A8
NEAT1
MCL1
KLF6
JUNB
JUN
IRF1
IL6ST
CDKN1B
BRD2
BHLHE40
AHNAK
LTB
TIMP1
LGALS3
CD320
AREG
FN1
ADAM12
HMGB1
NAMPT
UTS2
ANXA1
EMP1
ACTN1
FTH1
LDHA
RTN4
PIM3
ADAM9
NEDD9
JMJD1C
ZMIZ1
SKIL
FOSL2
TAGLN2
CD55
VCAN
TAPBP
CXCL3
TNS3
NDRG1
S100A10
RBPJ
IL6R
KDM6B
SERPINE1
ITGAX
ITGA5
GSTO1
VEGFA
TLR2
STAT1
PTGER2
PLAUR
PIM1
NFKBIA
GBP1
FCGR3A
CXCL2
TNFRSF10B
TNFRSF10A
TNFSF10
CSF1R
CSF1
ADGRE5
ALOX5
ALOX5AP
C5AR1
RPS19
LTBR
TIGIT
NECTIN2
CD226
TNFRSF10D
SIRPA
TNFRSF12A
CTLA4
