# Supplementary material for: Single cell immunoprofile of synovial fluid in rheumatoid arthritis with TNF-α/JAK inhibitor treatment
Source: Research Square preprint supplement (doi:10.21203/rs.3.rs-3166544/v1), 2023-07-24
Supplement: Supplementary file 2 [file e2921a5791eb217080a5a2dc.xlsx]

## Sheet: Sheet1
Supplementary Table 3. Clinical characteristics of patients in validation cohort.
		OA（n=23）	RA（n=35）	RA（n=35）							P	Pa
				ADA（n=12）			TOF（n=15）			None（n=8）
Demographic variables	Age, years (mean ± SD)	63.65 ± 7.25	52.83 ± 11.85	55.08 ± 8.86			49.60 ± 15.22			55.50 ± 7.48	0.0002	0.433
	Females, n (%)	13（56.52）	32（91.43）	10（83.33）			14（93.33）			8（100.00）	0.0018	0.5692
	Disease Duration, years (mean ± SD)	7.04 ± 3.76	7.51 ± 8.22	5.63 ± 5.84			8.49 ± 9.24			8.50 ± 9.73	0.3229	0.3151
		OA（n=23）		RA（n=35）							Pb	Pc
				RA-BT（n=35）	RA-AT（n=24）	ADA-BT（n=12）	ADA-AT（n=11）	TOF-BT（n=15）	TOF-AT（n=13）	None（n=8）
RA-related variables	CRP, mg/L(mean ± SD)	2.33 ± 1.65		47.34 ± 43.08	50.83 ± 43.86	60.42 ± 49.07	52.91 ± 43.65	49.29 ± 42.87	49.07 ± 45.74	24.09 ± 25.19	<0.0001	0.6486
	DAS28, (mean ± SD)	——		5.04 ± 0.88	5.27 ± 0.85	5.25 ± 1.01	5.34 ± 1.00	5.26 ± 0.69	5.21 ± 0.73	4.32 ± 0.69	—	0.3218
	SDAI, (mean ± SD)	——		29.07 ± 12.03	31.87 ± 12.74	32.71 ± 13.18	33.56 ± 13.47	30.8 ± 11.58	30.45 ± 12.46	20.39 ± 6.86	—	0.4363
OA: Osteoarthritis; RA: Rheumatoid Arthritis; ADA: Adalimumab; TOF:Tofacitinib; RF:Rheumatoid Factor; CCP: Cyclic citrullinated peptide; CRP: C-reactive protein.; DAS: Disease Activity Score; SDAI: Simplified disease activity index; P: OA vs. RA; Pa: ADA vs. TOF; Pb: OA vs. RA-BT; Pc: RA-BT vs. RA-AT.
