# Supplementary material for: Single cell immunoprofile of synovial fluid in rheumatoid arthritis with TNF-α/JAK inhibitor treatment
Source: Research Square preprint supplement (doi:10.21203/rs.3.rs-3166544/v1), 2023-07-24
Supplement: Supplementary file 3 [file e6aef49f8dd262d46e22e8f1.xlsx]

## Sheet: Supplementary Data 1
Supplementary table 1. Patient characteristics at baseline.
Sample NO.	Sex	Age, years	Disease duration, years	RF, IU/ml	CCP	CRP, mg/L	DAS28	SDAI	ACR20	Methotrexate at enrollment (Y/N)	b/tsDMARDs at enrollment	10X single cell sequencing(Y/N)	Elisa (Y/N)	Bulk (Y/N)	Flow cytometry (Y/N)	Cohort
RA_1_1	F	49	10	85.4	pos	17.5	5.29	28.75	Y	Y	ADA	Y	N	N	N	Discovery
RA_2_1	F	55	10	<20	pos	31.6	4.43	19.16	Y	Y	ADA	Y	N	N	N	Discovery
RA_3_1	F	51	17	md	pos	19.5	4.15	16.95	N	Y	ADA	Y	N	N	N	Discovery
RA_4_1	F	47	5	40.4	pos	76.1	5.16	27.61	Y	Y	TOF	Y	N	N	N	Discovery
RA_5_1	F	32	13	300	pos	5.89	4.22	19.58	N	Y	TOF	Y	N	N	N	Discovery
RA_6_1	F	54	2 months	29.2	pos	74.3	6.93	51.43	Y	Y	TOF	Y	N	N	N	Discovery
OA_1_1	F	74	10	NA	NA	6.94	NA	NA	NA	N	-	Y	N	N	N	Discovery
OA_2_1	F	59	10	NA	NA	6.1	NA	NA	NA	N	-	Y	N	N	N	Discovery
OA_3_1	M	66	2	NA	NA	6.06	NA	NA	NA	N	-	Y	N	N	N	Discovery
RAa-1-1	F	23	7	1050	pos	77.6	5.09	26.76	N	Y	TOF	N	Y	Y	N	Validation
RAa-1-2	F	45	16	md	pos	66	5.29	28.6	N	Y	TOF	N	Y	Y	N	Validation
RAa-1-3	F	57	15	79.7	pos	16.4	5.19	29.64	N	Y	ADA	N	Y	Y	N	Validation
RAa-1-4	F	47	1	206	pos	11.5	4.68	23.15	Y	Y	TOF	N	Y	Y	N	Validation
RAa-1-5	F	52	13	<20	pos	15.5	4.72	23.55	Y	Y	ADA	N	Y	Y	N	Validation
RAa-1-6	F	40	13	<20	pos	19.1	4.39	16.91	N	Y	TOF	N	Y	Y	N	Validation
RAa-1-7	F	60	31	104	pos	63.9	5.04	26.39	NA	Y	None	N	Y	N	N	Validation
RAa-1-8	F	47	2	686	pos	10.3	4.39	20.03	Y	Y	ADA	N	Y	Y	N	Validation
RAa-1-9	F	56	2	956	pos	68.3	5.57	32.83	NA	Y	TOF	N	Y	Y	N	Validation
RAa-1-10	F	66	2	286	pos	23.6	4	16.36	N	Y	ADA	N	Y	Y	N	Validation
RAa-1-11	F	59	1	34.4	pos	20.24	3.83	15.024	NA	Y	None	N	Y	N	N	Validation
RAa-1-12	F	54	3	3050	pos	143	4.24	23.3	Y	Y	ADA	N	N	Y	N	Validation
RAa-1-13	F	58	4	2470	pos	17.6	5.07	26.76	N	Y	TOF	N	Y	Y	N	Validation
RAa-1-14	M	68	2	1740	pos	163	5.68	40.3	N	Y	TOF	N	Y	Y	N	Validation
RAa-1-15	F	52	4	31.5	pos	31.3	3.83	17.13	N	Y	ADA	N	Y	Y	N	Validation
RAa-1-16	F	35	4 months	95.2	pos	18.7	4.69	23.87	Y	Y	TOF	N	Y	Y	N	Validation
RAa-1-17	F	47	2	119	pos	62.1	4.67	22.1	NA	Y	None	N	Y	N	N	Validation
RAa-1-19	F	51	6 months	84	pos	101	6.68	51.1	Y	Y	ADA	N	Y	N	N	Validation
RAa-1-20	F	49	10	755	pos	133	6.6	51.3	Y	Y	ADA	N	Y	N	N	Validation
RAa-1-21	F	53	19	70	pos	31.1	4.59	21.11	Y	Y	TOF	N	Y	N	N	Validation
RAa-1-22	M	47	15	617	pos	70.5	5.91	45.05	Y	Y	ADA	N	Y	N	N	Validation
RAa-1-23	F	46	5	<20	pos	5.89	6.48	56.589	Y	Y	TOF	N	Y	N	N	Validation
RAa-1-24	F	59	3	<20	pos	51.2	5.02	25.12	Y	Y	TOF	N	Y	N	N	Validation
RAa-1-25	F	67	10	89.77	pos	8.33	3.67	10.833	NA	Y	None	N	Y	N	N	Validation
RAa-1-28	F	52	7	106.1	pos	33.17	5.59	33.317	NA	Y	TOF	N	Y	N	N	Validation
RAa-1-29	F	59	3	146.74	pos	24.37	4.93	25.437	NA	Y	None	N	Y	N	N	Validation
RAa-1-30	M	56	1	994	pos	81.6	5.42	31.16	Y	Y	ADA	N	Y	N	N	Validation
RAa-1-31	F	81	35	19.73	pos	38.08	4.92	25.808	Y	Y	TOF	N	Y	N	Y	Validation
RAa-1-33	F	52	1	93	pos	8.85	6.16	46.885	N	Y	ADA	N	N	N	Y	Validation
RAa-1-34	F	56	10	26.2	pos	26.1	5.02	25.61	Y	Y	TOF	N	N	N	Y	Validation
RAa-1-35	F	57	4	89.81	pos	5.66	5.04	30.566	NA	Y	None	N	N	N	Y	Validation
RAa-1-36	F	25	3	371	pos	112	6.86	55.2	Y	Y	TOF	N	N	N	Y	Validation
RAa-1-37	F	78	1	430	pos	90	5.88	37	Y	Y	ADA	N	N	N	Y	Validation
RAa-1-40	F	50	10	94.27	pos	5.66	4.08	18.566	NA	Y	None	N	N	N	Y	Validation
RAa-1-41	F	45	7	93.32	pos	2.42	3.29	14.242	NA	Y	None	N	N	N	Y	Validation
OAa-1-2	F	66	15	NA	NA	1.79	NA	NA	NA	N	-	N	Y	N	N	Validation
OAa-1-3	M	57	10	NA	NA	1.84	NA	NA	NA	N	-	N	Y	N	N	Validation
OAa-1-4	M	70	10	NA	NA	1.83	NA	NA	NA	N	-	N	N	Y	N	Validation
OAa-1-5	F	64	7	NA	NA	3.93	NA	NA	NA	N	-	N	Y	N	N	Validation
OAa-1-6	M	66	1	NA	NA	2.88	NA	NA	NA	N	-	N	Y	N	N	Validation
OAa-1-7	M	62	10	NA	NA	1.05	NA	NA	NA	N	-	N	Y	Y	N	Validation
OAa-1-9	F	67	5	NA	NA	0.55	NA	NA	NA	N	-	N	Y	Y	N	Validation
OAa-1-10	F	69	6	NA	NA	1.47	NA	NA	NA	N	-	N	Y	Y	N	Validation
OAa-1-11	F	62	8	NA	NA	0.21	NA	NA	NA	N	-	N	Y	N	N	Validation
OAa-1-12	F	82	5	NA	NA	2.69	NA	NA	NA	N	-	N	Y	N	N	Validation
OAa-1-14	F	59	10	NA	NA	1.18	NA	NA	NA	N	-	N	Y	N	N	Validation
OAa-1-22	F	68	10	NA	NA	4.37	NA	NA	NA	N	-	N	N	Y	N	Validation
OAa-1-23	M	56	5	NA	NA	1.92	NA	NA	NA	N	-	N	N	N	Y	Validation
OAa-1-26	F	66	13	NA	NA	1.07	NA	NA	NA	N	-	N	N	N	Y	Validation
OAa-1-27	F	64	6	NA	NA	4.46	NA	NA	NA	N	-	N	N	N	Y	Validation
OAa-1-28	M	52	3	NA	NA	md	NA	NA	NA	N	-	N	N	N	Y	Validation
OAa-1-29	M	67	3	NA	NA	0.77	NA	NA	NA	N	-	N	N	N	Y	Validation
OAa-1-30	F	68	11	NA	NA	4.12	NA	NA	NA	N	-	N	N	N	Y	Validation
OAa-1-31	F	70	8	NA	NA	7.24	NA	NA	NA	N	-	N	N	N	Y	Validation
OAa-1-32	M	53	8	NA	NA	2.52	NA	NA	NA	N	-	N	N	N	Y	Validation
OAa-1-33	M	59	1	NA	NA	2.56	NA	NA	NA	N	-	N	N	N	Y	Validation
OAa-1-34	F	49	2	NA	NA	1.46	NA	NA	NA	N	-	N	N	N	Y	Validation
OAa-1-36	M	68	5	NA	NA	1.28	NA	NA	NA	N	-	N	N	N	Y	Validation
RF, rheumatoid factor
CCP, cyclic citrullinated peptide
TOF, tofacitinib; ADA, adalimumab
NA, not applicable; N, no; Y, yes; pos, positive; md, missing data
