# Supplementary material for: Single cell immunoprofile of synovial fluid in rheumatoid arthritis with TNF-α/JAK inhibitor treatment
Source: Research Square preprint supplement (doi:10.21203/rs.3.rs-3166544/v1), 2023-07-24
Supplement: Supplementary file 4 [file e7b9863a9fcdf724a9db47f4.xlsx]

## Sheet: Sheet1
Supplementary Table 2. Clinical characteristics of patients in discovery cohort.
		OA（n=3）	RA（n=6）	RA（n=6）						P	Pa
				ADA（n=3）			TOF（n=3）
Demographic variables	Age, years (mean ± SD)	66.33 ± 7.51	48 ± 8.39	51.67 ± 3.06			44.33 ± 11.24			0.0154	0.3368
	Females, n (%)	2（66.67）	6（100.00）	3（100.00）			3（100.00）			0.3333	>0.9999
	Disease Duration, years (mean ± SD)	7.33 ± 4.62	9.21± 5.90	12.33 ± 4.04			6.08 ± 6.44			0.6484	0.2278
		OA（n=3）		RA（n=6）						Pb	Pc
				RA-BT	RA-AT	ADA-BT	ADA-AT	TOF-BT	TOF-AT
RA-related variables	CRP, mg/L(mean ± SD)	6.37 ± 0.50		37.48 ±30.34	8.33 ± 5.21	22.87 ± 7.63	8.33 ± 5.21	52.1 ± 40.03	8.58 ± 5.41	0.1299	0.0428
	DAS28, (mean ± SD)	——		5.03 ± 1.05	3.70 ± 0.39	4.62 ± 0.60	3.48 ± 0.22	5.44 ± 1.38	3.92 ± 0.44	—	0.0153
	SDAI, (mean ± SD)	——		27.25 ± 12.79	13.67 ± 3.27	21.62 ± 6.27	11.81 ± 2.24	32.87 ± 16.56	15.52 ± 3.37	—	0.0303
OA: Osteoarthritis; RA: Rheumatoid Arthritis; ADA: Adalimumab; TOF:Tofacitinib; RF:Rheumatoid Factor; CCP: Cyclic citrullinated peptide; CRP: C-reactive protein.; DAS: Disease Activity Score; SDAI: Simplified disease activity index; P: OA vs. RA; Pa: ADA vs. TOF; Pb: OA vs. RA-BT; Pc: RA-BT vs. RA-AT.
